# Supplementary material
Source: ML conference proceedings conference paper supplement (https://proceedings.neurips.cc/paper_files/paper/2013/hash/e00406144c1e7e35240afed70f34166a-Abstract.html)
Supplement: Supplementary file [file e00406144c1e7e35240afed70f34166a-Supplemental.zip]

## A Proofs

We restate the results proved here for convenience.

### A.1 Proof of Theorem 3

**Theorem 1.** *For every  $t$  and every sequence  $g_1, \dots, g_t \in \mathcal{G}$ , we can write the conditional value of the game as*

$$V_t(g_1, \dots, g_t) = \max_{G \in \Delta(\mathcal{G}'), \mathbb{E}[G]=0} \mathbb{E}[V_{t+1}(g_1, \dots, g_t, G)],$$

where  $\Delta(\mathcal{G}')$  is the set of random variables on  $\mathcal{G}'$ . Moreover, for all  $t$  the function  $V_t$  is convex in each of its coordinates and bounded.

*Proof.* We prove both statements simultaneously via induction on  $t$ . For the base case,  $t = T - 1$ , we have

$$V_{T-1}(g_1, \dots, g_{T-1}) = \inf_{x_T} \sup_{g_T} g_T \cdot x_T - L(g_1, \dots, g_{T-1}, g_T).$$

Because the supremum is taken over  $\mathcal{G}$  whose convex hull is assumed to be a polytope, we can replace the  $\sup_{g_T \in \mathcal{G}}$  with  $\max_{g_T \in \mathcal{G}'}$ . Furthermore, we can replace the maximization over points from  $\mathcal{G}'$  with the maximization of distributions over  $\mathcal{G}' = \{g^i\}_{i=1, \dots, m}$ . That is, we can write

$$V_{T-1}(g_1, \dots, g_{T-1}) = \inf_{x_T} \max_{\vec{\alpha} \in \Delta_m} \sum_{i=1}^m \alpha_i (g^i \cdot x_T - L(g_1, \dots, g_{T-1}, g^i)).$$

The set  $\Delta_m$  is a compact convex set, and the objective  $\sum_{i=1}^m \alpha_i (g^i \cdot x_T - L(g_1, \dots, g_{T-1}, g^i))$  is linear in both  $x$  and  $\vec{\alpha}$  hence we can apply Sion's Minimax theorem to obtain

$$V_{T-1}(g_1, \dots, g_{T-1}) = \max_{\vec{\alpha} \in \Delta_m} \inf_{x_T} \left( \sum_i \alpha_i g^i \right) \cdot x_T - \sum_i \alpha_i L(g_1, \dots, g_{T-1}, g^i).$$

Notice that if  $\sum_i \alpha_i g^i \neq \mathbf{0}$  then the infimum is  $-\infty$  since the player can make the objective arbitrarily small. Hence we can restrict the outer maximization to distributions  $\vec{\alpha}$  such that  $\sum_i \alpha_i g^i = \mathbf{0}$ . This simplifies the expression to

$$V_{T-1}(g_1, \dots, g_{T-1}) = \max_{\vec{\alpha} \in \Delta_m} - \sum_i \alpha_i L(g_1, \dots, g_{T-1}, g^i) \quad \text{s.t.} \quad \sum_i \alpha_i g^i = \mathbf{0}.$$

Notice that, by assumption,  $-L$  is convex in each of its arguments, and hence  $V_{T-1}(g_1, \dots, g_{T-1})$  is also convex in each  $g_t$  independently, since the maximum of convex functions is convex.

The inductive argument follows identically to the base case, but where we replace  $-L$  with  $V_t$ , since we can write

$$V_{t-1}(g_1, \dots, g_{t-1}) = \inf_{x_t} \sup_{g_t \in \mathcal{G}} g_t \cdot x_t + V_t(g_1, \dots, g_{t-1}, g_t).$$

□

**Theorem 3.** *There exists a set of  $n + 1$  distinct points  $\{g^1, \dots, g^{n+1}\} \subset \mathcal{G}$  whose convex hull is of full rank, and a distribution  $\vec{\alpha} \in \Delta_{n+1}$  satisfying  $\sum_{i=1}^{n+1} \alpha_i g^i = \mathbf{0}$ , such that  $V = \sum_{i=1}^{n+1} \alpha_i f(g^i)$ . Moreover, an optimal choice for the infimum in (6) is the gradient of the unique linear interpolation of the pairs  $\{(g^1, -f(g^1)), \dots, (g^{n+1}, -f(g^{n+1}))\}$ .*

We prove this theorem via a sequence of lemmas. We begin with the observation that we may assume, without loss of generality, that  $\mathcal{G}$  is convex, and hence  $\mathcal{G} = \text{ConvexHull}(\mathcal{G})$ . This is because, for any  $x$ , the objective  $\sup_{g \in \mathcal{G}} x \cdot g + f(g)$  will always be achieved at the boundary of  $\mathcal{G}$  since the objective function  $x \cdot g + f(g)$  is the sum of two convex functions and is thus convex.

**Lemma 11.** *The infimum in (6) is achieved in a bounded set.*

*Proof.* Let  $M = \sup_{g \in \mathcal{G}} |f(g)|$  then clearly we have that  $\inf_{x \in \mathbb{R}^n} \sup_{g \in \mathcal{G}} x \cdot g + f(g) \leq M$  since  $x$  can be chosen as  $\mathbf{0}$ . It is sufficient to show any  $x$  such that  $\|x\| > 2M/\epsilon$  achieves a worse value than  $\mathbf{0}$ . Since  $\mathbf{0}$  is in the interior of  $\mathcal{G}$ , there exists an  $\epsilon > 0$  such that  $g = \frac{\epsilon x}{\|x\|} \in \mathcal{G}$ . Then,  $\sup_{g \in \mathcal{G}} x \cdot g + f(g) \geq x \cdot \frac{\epsilon x}{\|x\|} + f(g) > 2M - M = M$ .  $\square$

The above lemma is useful since it lets us conclude that we need not necessarily assume  $x$  is unbounded. Moreover, since the inf is achieved on a compact set, then it has at least one solution  $x^*$  that we can analyze. Let  $\Phi \subset \mathbb{R}^n$  denote the set of points  $x$  on which the infimum in (6) is achieved. For any  $x$ , let  $\Gamma(x) \subset \mathcal{G}$  be the set of corners of the polytope  $\mathcal{G}$  on which the supremum  $\sup_{g \in \mathcal{G}} x \cdot g + f(g)$  is achieved for fixed  $x$ .

**Lemma 12.** *For any  $x \in \Phi$ , the set  $\text{ConvexHull}(\Gamma(x))$  must contain the origin.*

*Proof.* Let us assume that  $\mathbf{0} \notin \text{ConvexHull}(\Gamma(x))$ , then I will show that this contradicts the assumption that  $x$  is optimal. If  $v$  is the value of the objective in (6), then define  $\Gamma_\epsilon(x)$  to be the set of  $g \in \mathcal{G}$  such that  $g \cdot x + f(x) \geq v - \epsilon$ . We claim that we can choose  $\epsilon > 0$  small enough so that  $\text{ConvexHull}(\Gamma_\epsilon(x))$  also does not contain  $\mathbf{0}$ . This implies that there is some  $\delta > 0$  such that  $\|g\| > \delta$  for all  $g \in \text{ConvexHull}(\Gamma_\epsilon(x))$ . Moreover, since  $\text{ConvexHull}(\Gamma_\epsilon(x))$  is a convex set there must be a separating hyperplane between  $\mathbf{0}$  and  $\text{ConvexHull}(\Gamma_\epsilon(x))$ , and hence there is some unit vector  $z \in \mathbb{R}^n$  (the normal to the hyperplane) such that  $z \cdot g < -\delta$  for all  $g \in \text{ConvexHull}(\Gamma_\epsilon(x))$ .

Choose  $B > 0$  such that  $\|g\| \leq B$  for all  $g \in \mathcal{G}$ . We claim that the point  $x' \equiv x + \frac{\epsilon}{2B}z$  has a strictly smaller objective value than  $x$ . Consider any  $g \in \text{ConvexHull}(\Gamma_\epsilon(x))$ , then we have

$$g \cdot x' + f(g) = g \cdot x + f(g) + \frac{\epsilon}{2B}z \cdot g < v - \frac{\epsilon\delta}{2B} < v.$$

On the other hand, for any  $g \in \mathcal{G} \setminus \text{ConvexHull}(\Gamma_\epsilon(x))$  we have

$$g \cdot x' + f(g) = g \cdot x + f(g) + \frac{\epsilon}{2B}z \cdot g < v - \epsilon + \frac{\epsilon}{2B}z \cdot g \leq v - \epsilon + \frac{\epsilon}{2B}\|g\| \leq v - \frac{\epsilon}{2} < v$$

where the first inequality follows because by assumption  $g \notin \Gamma_\epsilon(x)$ . It follows from these two expressions that  $\sup_{g \in \mathcal{G}} g \cdot x' + f(g) < \sup_{g \in \mathcal{G}} g \cdot x + f(g)$ , a contradiction.  $\square$

Concluding that  $\text{ConvexHull}(H)$  contains the origin is actually surprisingly useful.

**Lemma 13.** *There is some  $x \in \Phi$  such that  $\text{ConvexHull}(\Gamma(x))$  has a non-empty interior.*

Another way to put this is that  $\Gamma(x)$  has at least  $n + 1$  points such that none of these is a convex combination of the others.

*Proof.* Notice that  $\Phi$  is a convex set and, via Lemma 11, is bounded and compact. We claim that any  $x$  on the boundary of  $\Phi$  satisfies the goal of the lemma. Choose a boundary point  $x \in \Phi$ , and assume that  $\text{ConvexHull}(\Gamma(x))$  is not of full-rank. Via Lemma 12, this set contains the origin, and hence we can find some unit vector  $z$  such that  $z \cdot g = 0$  for all  $g \in \text{ConvexHull}(\Gamma(x))$ .

Since  $\mathcal{G}$  is a polytope, we can describe it as the hull of a finite number of points  $\mathcal{G}' \equiv \{g^1, \dots, g^m\}$ . For any  $g^i \notin \Gamma(x)$  we have  $g^i \cdot x + f(g^i) < v$ . Choose some  $\epsilon > 0$  so that  $g^i \cdot x + f(g^i) < v - \epsilon$  for every  $g^i \in \mathcal{G}' \setminus \Gamma(x)$ , which is possible since this is a finite set. Let  $B > 0$  be a bound on the norm of all points in  $\mathcal{G}$ . Then we claim that the points  $x + \frac{\epsilon}{2B}z$  and  $x - \frac{\epsilon}{2B}z$  are both members of  $\Phi$ . Of course, the latter statement contradicts the assumption that  $x$  is at the boundary of  $\Phi$ . To prove the final claim, notice that by the convexity of  $f$  we have

$$\sup_{g \in \mathcal{G}} g \cdot \left(x + \frac{\epsilon}{2B}z\right) + f(g) = \max_{i=1, \dots, m} g^i \cdot \left(x + \frac{\epsilon}{2B}z\right) + f(g^i).$$

For the last expression, we can check two cases. If  $g^i \in \Gamma(x)$  then  $g^i \cdot z = 0$  in which case  $g^i \cdot \left(x + \frac{\epsilon}{2B}z\right) + f(g^i) = g^i \cdot x + f(g^i)$ . On the other hand, for  $g^i \notin \Gamma(x)$  we have

$$g^i \cdot \left(x + \frac{\epsilon}{2B}z\right) + f(g^i) = g^i \cdot x + f(g^i) = \frac{\epsilon}{2B}g^i \cdot z < v - \epsilon + \epsilon/2 < v.$$

Hence the value of the objective is the same for  $x$  and  $x + \frac{\epsilon}{2B}z$ . A similar argument follows for  $x - \frac{\epsilon}{2B}z$ .  $\square$

**Lemma 14.** *If  $x \in \Phi$  and we pick any full-rank set of points  $g_1, \dots, g_{n+1} \in \Gamma(x)$  whose hull contains the origin, then we may write  $x$  as the gradient of the linear interpolation of the points  $\{(g_1, -f(g_1)), \dots, (g_{n+1}, -f(g_{n+1}))\}$ . Moreover, this implies that  $x$  is a subgradient of the function  $f$  restricted to the set  $\mathcal{G}$ .*

*Proof.* Let us notice that if we were to search for the linear interpolation of the points  $\{(g_1, -f(g_1)), \dots, (g_{n+1}, -f(g_{n+1}))\}$ , then we would need to find a vector  $m \in \mathbb{R}^n$  and an offset  $b \in \mathbb{R}$  such that

$$m \cdot g_i + b = -f(g_i) \quad \forall i = 1, \dots, n+1,$$

and indeed since the set of  $g_i$ 's is of full rank this has a unique solution. However, the point  $x$  also satisfies a similar set of equations:

$$x \cdot g_i + f(g_i) = c \quad \forall i = 1, \dots, n+1,$$

where  $c$  is the value of the objective in (6). Given the uniqueness of the above to systems of equations, we have that  $m = x$ .  $\square$

Now given the above results we can actually construct the optimal strategy for the adversary.

**Lemma 15.** *For any full-rank set of points  $g_1, \dots, g_{n+1} \in \Gamma(x)$  whose hull contains the origin, let  $\vec{\alpha} \in \Delta_{n+1}$  be a set of weights such that  $\sum_i \alpha_i g_i = \mathbf{0}$  (and indeed  $\vec{\alpha}$  is unique). Then the value of the objective (6) is precisely  $\sum_i \alpha_i f(g_i)$ . Moreover, one optimal randomized strategy for the adversary is to choose  $g_i$  with probability  $\alpha_i$ .*

*Proof.* Recall that the point  $x^*$  satisfies a system of linear equations

$$x^* \cdot g_i + f(g_i) = c \quad \forall i = 1, \dots, n+1,$$

where  $c$  is the value of the objective. Furthermore, it also satisfies any *mixture* of these equations. By taking an  $\vec{\alpha}$  mixture of these equations we have

$$c = \sum_i \alpha_i (g_i \cdot x^* + f(g_i)) = \mathbf{0} \cdot x^* + \sum_i \alpha_i f(g_i) = \sum_i \alpha_i f(g_i).$$

$\square$

## A.2 Proofs from Section 3

**Theorem 7.** *The value of this game is  $V^T = \mathbb{E}_{G \sim \mathcal{B}_T} \left[ \frac{1}{2\sigma} G^2 \right] = \frac{T}{2\sigma}$ .*

*Proof.* Starting from Eq. (10),

$$\begin{aligned} \mathbb{E}_{G \sim \mathcal{B}_T} [G^2] &= \frac{1}{2^T} \sum_{i=0}^T \binom{T}{i} (2i - T)^2 \\ &= \frac{1}{2^T} \left( 4 \sum_{i=0}^T \binom{T}{i} i^2 - 4T \sum_{i=0}^T \binom{T}{i} i + T^2 \sum_{i=0}^T \binom{T}{i} \right) \end{aligned} \quad \text{Eq. (10)}$$

and since  $\sum_{t=0}^T \binom{T}{t} = 2^T$ ,  $\sum_{t=0}^T \binom{T}{t} t = T2^{T-1}$ ,  $\sum_{t=0}^T \binom{T}{t} t^2 = (T + T^2)2^{T-2}$ ,

$$\begin{aligned} &= \frac{1}{2^T} \left( 4(T + T^2)2^{T-2} - 4T(T2^{T-1}) + T^2 2^T \right) \\ &= (T + T^2) - 2T^2 + T^2 = T. \end{aligned}$$

The result then follows from linearity of expectation.  $\square$

**Theorem 8.** *Consider the game where  $\mathcal{G} = [-1, 1]$  with benchmark  $L(G) = -\exp(G/\sqrt{T})$ . Then*

$$V^T = \left( \cosh \frac{1}{\sqrt{T}} \right)^T \leq \sqrt{e}$$

with the bound tight as  $T \rightarrow \infty$ . Let  $\tau = T - t$  and  $G_t = g_{1:t}$ , then the conditional value of the game is  $V_t(G_t) = \left(\cosh \frac{1}{\sqrt{T}}\right)^\tau \exp\left(\frac{G_t}{\sqrt{T}}\right)$  and the player's minimax optimal strategy is:

$$x_{t+1} = -\exp\left(\frac{G_t}{\sqrt{T}}\right) \sinh \frac{1}{\sqrt{T}} \left(\cosh \frac{1}{\sqrt{T}}\right)^{\tau-1} \quad (12)$$

*Proof.* First, we compute the value of the game:

$$\begin{aligned} V^T &= \mathbb{E}_{G \sim \mathcal{B}_T} [-L(G)] = 2^{-T} \sum_{i=0}^T \binom{T}{i} \exp\left(\frac{2i-T}{\sqrt{T}}\right) \\ &= 2^{-T} \exp(-\sqrt{T}) \sum_{i=0}^T \binom{T}{i} \left(\exp(2/\sqrt{T})\right)^i \\ &= 2^{-T} \exp(-\sqrt{T}) \left(1 + \exp(2/\sqrt{T})\right)^T, \end{aligned}$$

where we have used the ordinary generating function,  $\sum_{i=0}^T \binom{T}{i} x^i = (1+x)^T$ . Manipulating the above expression for the value of the game, we arrive at  $V^T = \cosh(1/\sqrt{T})^T$ . Using the series expansion for cosh leads to the upper bound  $\cosh(x) \leq \exp(x^2/2)$ ,

from which we conclude

$$V_T = \left(\cosh(1/\sqrt{T})\right)^T \leq \exp\left(\frac{1}{2T}\right)^T = \sqrt{e}.$$

Using similar techniques, we can derive the conditional value of the game, letting  $\tau = T - t$  be the number of rounds left to be played:

$$V_t(G_t) = 2^{-\tau} \sum_{i=0}^{\tau} \binom{\tau}{i} \exp\left(\frac{G_t + 2i - \tau}{\sqrt{T}}\right) = 2^{-\tau} \exp\left(\frac{G_t - \tau}{\sqrt{T}}\right) \left(1 + \exp(2/\sqrt{T})\right)^\tau.$$

Following Eq. (9) and simplifying leads to the update of Eq. (12). It remains to show  $\lim_{T \rightarrow \infty} V_T = \sqrt{e}$ . Using the change of variable  $x = 1/\sqrt{T}$ , equivalently we have  $\lim_{x \rightarrow 0} \cosh(x)^{\frac{1}{x^2}}$ . Examining the log of this function,

$$\lim_{x \rightarrow 0} \log \left( \cosh(x)^{\frac{1}{x^2}} \right) = \lim_{x \rightarrow 0} \frac{1}{x^2} \log \cosh(x) = \lim_{x \rightarrow 0} \frac{1}{x^2} \left( \frac{x^2}{2} - \frac{x^4}{12} + \frac{x^6}{45} - \frac{17x^8}{2520} + \dots \right) = \frac{1}{2},$$

where we have taken the Maclaurin series of  $\log \cosh(x)$ . Using the continuity of  $\exp$ , we have against any adversary,

$$\lim_{x \rightarrow 0} \left( \cosh(x)^{\frac{1}{x^2}} \right) = \exp \left( \lim_{x \rightarrow 0} \log \left( \cosh(x)^{\frac{1}{x^2}} \right) \right) = \sqrt{e}.$$

□

**Theorem 9.** Consider a one dimensional game with  $\mathcal{G} = [-1, 1]$  with benchmark function  $L$  non-positive on  $\mathcal{G}^T$ . Then for the optimal betting strategy we have that  $|x_t| \leq -\sum_{s=1}^t g_s x_s + V^T$ , and further  $V^T \geq \sum_{s=1}^t g_s x_s$  for any  $t$  and any sequence  $g_1, \dots, g_t$ .

*Proof.* We need to prove

$$\sum_{s=1}^t g_s x_s \leq V^T \quad (15)$$

and

$$|x_t| \leq -\sum_{s=1}^t g_s x_s + V^T. \quad (16)$$

The definition of the value of the game and the fact the algorithm is minimax optimal ensures

$$\sum_{t=1}^T g_t x_t - L(G) \leq V^T$$

or, since  $-L(G) \geq 0$ ,

$$\sum_{t=1}^T g_t x_t \leq V^T. \quad (17)$$

Now, suppose on some round  $t$  we have  $\sum_{s=1}^t g_s x_s > V^T$ . Then, the adversary can simply play  $g_\tau = 0$  for rounds  $t+1, \dots, T$ , which implies

$$\sum_{s=1}^T g_s x_s = \sum_{s=1}^t g_s x_s > V^T,$$

contradicting Eq. (17). Hence, Eq. (15) must hold. Further, if the player ever chose a bet so large it violated Eq. (16), the adversary could choose  $g_t \in \{-1, 1\}$  in order to violate Eq. (17).  $\square$

**Theorem 10.** *Consider the game between an adversary who chooses losses  $g_t \in [-1, 1]$ , and a player who chooses  $x_t \in \mathbb{R}$ . For a given sequence of plays,  $x_1, g_1, x_2, g_2, \dots, x_T, g_T$ , the value to the adversary is  $\sum_{t=1}^T g_t x_t - |g_{1:T}|$ . Then, when  $T$  is even with  $T = 2M$ , the minimax value of this game is given by*

$$V_T = 2^{-T} \frac{2M T!}{(T-M)!M!} \leq \sqrt{\frac{2T}{\pi}}.$$

Further, as  $T \rightarrow \infty$ ,  $V_T \rightarrow \sqrt{\frac{2T}{\pi}}$ . Let  $B$  be a random variable drawn from  $\mathcal{B}_{T-t}$ . Then the minimax optimal strategy for the player given the adversary has played  $G_t = g_{1:t}$  is given by

$$x_{t+1} = \Pr(B < -G_t) - \Pr(B > -G_t) = 1 - 2\Pr(B > -G_t) \in [-1, 1]. \quad (14)$$

*Proof.* Letting  $T = 2M$  and working from Eq. (10),

$$V^T = -\mathbb{E}_{G \sim \mathcal{B}_T} [L(G)] = \frac{2}{2^T} \sum_{i=0}^T \binom{T}{i} |i - M| = \frac{2M}{2^T} \binom{2M}{M} = 2^{-T} \frac{2M T!}{(T-M)!M!}, \quad (18)$$

where we have applied a classic formula of de Moivre [1718] for the mean absolute deviation of the binomial distribution (see also Diaconis and Zabell [1991]). Using a standard bound on the central binomial coefficient (based on Stirling's formula),

$$\binom{2M}{M} = \frac{4^M}{\sqrt{\pi M}} \left(1 - \frac{c_M}{M}\right) \quad (19)$$

where  $\frac{1}{9} < c_M < \frac{1}{8}$  for all  $M \geq 1$ , we have

$$V^T \leq 2M \frac{1}{\sqrt{\pi M}} = \sqrt{\frac{2T}{\pi}}.$$

As implied by Eq. (19), this inequality quickly becomes tight as  $T \rightarrow \infty$ .

In order to compute the minimax algorithm, we would like a closed form for  $V_t(G_t) = -\mathbb{E}_{G^\tau \sim \mathcal{B}_\tau} [L(G_t + G^\tau)]$ , where  $G_t = g_{1:t}$  is the sum of the gradients so far,  $\tau = T - t$  is the number of rounds to go, and  $G^\tau = g_{t+1:T}$  is a random variable giving the sum of the remaining gradients. Unfortunately, the structure of the binomial coefficients exploited in the proof of Theorem 10 does not apply given an arbitrary offset  $G_t$ . Nevertheless, we will be able to derive a formula for the update that is readily computable. Letting  $B$  be a random variable with distribution  $\mathcal{B}_\tau$ , the update of Eq. (9) becomes

$$x_{t+1} = \frac{1}{2} \sum_{b=-\tau}^{\tau} \Pr(B = b) (|G_t + b - 1| - |G_t + b + 1|).$$

Whenever  $G_t + b \geq 1$ , the difference in absolute values is  $-2$ , and whenever  $G_t + b \leq -1$ , the difference is  $2$ . When  $G_t + b = 0$ , the difference is zero. Thus,

$$x_{t+1} = \frac{1}{2} (\Pr(B > -G_t)(-2) + \Pr(B < -G_t)(2)) = \Pr(B < -G_t) - \Pr(B > -G_t).$$

$\square$

## B A Symmetric Betting Algorithm

The one-sided algorithm of Theorem 8 has

$$\text{Loss} = V^T + L(G) \leq -\exp\left(\frac{G}{\sqrt{T}}\right) + \sqrt{e}.$$

In order to do well when  $g_{1:T}$  is large and negative, we can run a copy of the algorithm on  $-g_1, \dots, -g_T$ , switching the signs of each  $x_t$  it suggests. The combined algorithm then satisfies

$$\begin{aligned} \text{Loss} &\leq -\exp\left(\frac{G}{\sqrt{T}}\right) - \exp\left(\frac{-G}{\sqrt{T}}\right) + 2\sqrt{e} \\ &\leq -\exp\left(\frac{|G|}{\sqrt{T}}\right) + 2\sqrt{e}, \end{aligned}$$

and so following Eq. (13) and Theorem 1 of Streeter and McMahan [2012], we obtain the desired regret bounds. The following theorem implies the symmetric algorithm is in fact minimax optimal with respect to the combined benchmark

$$L_C(G) = -\exp\left(\frac{G}{\sqrt{T}}\right) - \exp\left(\frac{-G}{\sqrt{T}}\right).$$

**Theorem 16.** *Consider two 1-D games where the adversary plays from  $[-1, 1]$ , defined by concave functions  $L_1$  and  $L_2$  respectively. Let  $x_t^1$  and  $x_t^2$  be minimax-optimal plays for  $L_1$  and  $L_2$  respectively, given that  $g_1, \dots, g_{t-1}$  have been played so far in both games. Then  $x_1 + x_2$  is also minimax optimal for the combined game that uses the benchmark  $L_C(G) = L_1(G) + L_2(G)$ .*

*Proof.* First, taking  $\tau = T - t$  and using Theorem 4 three times, we have

$$\begin{aligned} V^C(g_1, \dots, g_t) &= -\mathbb{E}_{G^\tau \sim \mathcal{B}_\tau} [L_1(g_{1:t} + G^\tau) + L_2(g_{1:t} + G^\tau)] \\ &= -\mathbb{E}_{G^\tau \sim \mathcal{B}_\tau} [L_1(g_{1:t} + G^\tau)] - \mathbb{E}_{G^\tau \sim \mathcal{B}_\tau} [L_2(g_{1:t} + G^\tau)] \\ &= V^1(g_1, \dots, g_t) + V^2(g_1, \dots, g_t), \end{aligned}$$

using linearity of expectation. Then, using Eq. (9) for each of the three games, we have

$$\begin{aligned} x_t^C &= \arg \min_x \max_g gx + V_C(g_1, \dots, g_{t-1}, g) \\ &= \frac{1}{2}(V_C(g_1, \dots, g_{t-1}, -1) - V_C(g_1, \dots, g_{t-1}, +1)) \\ &= \frac{1}{2}(V_1(g_1, \dots, g_{t-1}, -1) + V_2(g_1, \dots, g_{t-1}, -1) - V_1(g_1, \dots, g_{t-1}, +1) - V_2(g_1, \dots, g_{t-1}, +1)) \\ &= x_t^1 + x_t^2. \end{aligned}$$

□
